# Supplementary material
Source: publisher figshare collection journal article supplement (https://acs.figshare.com/ndownloader/files/3908395)
Supplement: Supplementary file 1 [file 3908395]

Supporting Information

**Tuning the extended structure and electronic properties of  
gold(I) thienyl pyrazolates**

Lyndsey D. Earl,<sup>†</sup> Jeffrey K. Nagle,<sup>‡</sup> and Michael O. Wolf<sup>\*†</sup>

<sup>†</sup>*Department of Chemistry, University of British Columbia, Vancouver BC, V6T 1Z1, Canada*

<sup>‡</sup>*Department of Chemistry, Bowdoin College, Brunswick, ME, 04011 USA*

## Procedures

### *1-[(4-Methylphenyl)sulfonyl]-4-(2-thienyl)-1H-pyrazole (TsPzT):*

A degassed 2:1 THF/water (24 mL) solution of K<sub>2</sub>CO<sub>3</sub> (0.304 g, 2.20 mmol), 2-thienyl boronic acid (0.128 g, 1.00 mmol), 4-iodo-1-[(4-methylphenyl)sulfonyl]-1*H*-pyrazole (0.347 g, 1.00 mmol), and Pd(PPh<sub>3</sub>)<sub>4</sub> (0.0648 g, 0.0560 mmol) was heated to reflux for 16 hours. The reaction mixture was cooled to room temperature and most of the THF was removed *in vacuo*. CH<sub>2</sub>Cl<sub>2</sub> (20 mL) was added to the resulting mixture and was washed with H<sub>2</sub>O (3 × 10 mL). The organic layer was dried over MgSO<sub>4</sub>, filtered, and the solvent was removed *in vacuo* to give an orange solid. The crude product was purified *via* column chromatography on silica gel with CH<sub>2</sub>Cl<sub>2</sub> as the eluent to give a white solid in 70 % yield. *m/z*: 304. <sup>1</sup>H NMR (300 MHz, CDCl<sub>3</sub>): δ 8.24 (s, 1H), 7.93 (d, J = 9 Hz, 2 H), 7.89 (s, 1H), 7.35 (d, J = 8 Hz, 2H), 7.25 (dd, J = 1 Hz, J = 8 Hz, 1 H), 7.14 (dd, J = 1 Hz, J = 3 Hz, 1H), 7.04 (dd, J = 3 Hz, J = 8 Hz), 2.43 (s, 3H).

### *3,5-Dimethyl-1-[(4-methylphenyl)sulfonyl]-4-(2-thienyl)-1H-pyrazole (TsPz\*T):*

A procedure similar to that used for the synthesis of TsPzT was used with reagents K<sub>2</sub>CO<sub>3</sub> (0.304 g, 2.20 mmol), 2-thienyl boronic acid (0.128 g, 1.00 mmol), 3,5-dimethyl-4-iodo-1-[(4-methylphenyl)sulfonyl]-1*H*-pyrazole (0.376 g, 1.00 mmol), and Pd(PPh<sub>3</sub>)<sub>4</sub> (0.058 g, 0.050 mmol) to give an orange solid. The crude product was purified *via* column chromatography on silica with CH<sub>2</sub>Cl<sub>2</sub> as the eluent to give a white solid in 69 % yield. *m/z*: 332. <sup>1</sup>H NMR (300 MHz, CDCl<sub>3</sub>): δ 7.90 (d, J = 8 Hz, 2H), 7.35 (m, 3H), 7.09 (dd, J = 3 Hz, J = 5 Hz), 6.91 (dd, J = 1 Hz, J = 3 Hz), 2.57 (s, 3H), 2.44 (s, 3H), 2.27 (s, 3H).

### *4-[5-(2,2'-Bithiophene)]-1-[(4-methylphenyl)sulfonyl]-1H-pyrazole (TsPzT<sub>2</sub>):*

A procedure similar to that used for the synthesis of TsPzT was used with reagents K<sub>2</sub>CO<sub>3</sub> (0.304 g, 2.20 mmol), 2,2'-bithiophene-5 boronic acid pinacol ester (0.292 g, 1.00 mmol), 4-iodo-1-[(4-methylphenyl)sulfonyl]-1*H*-pyrazole (0.348 g, 1.00 mmol), and Pd(PPh<sub>3</sub>)<sub>4</sub> (0.058 g, 0.050 mmol) to give an orange solid. The crude product was purified *via* column chromatography on silica with CH<sub>2</sub>Cl<sub>2</sub> as the eluent to give a light yellow solid in 51 % yield. *m/z*: 386. <sup>1</sup>H NMR (300 MHz, CDCl<sub>3</sub>): δ 8.23 (s, 1H), 7.93 (d, J = 8 Hz, 2H), 7.89 (s, 1H), 7.35 (d, J = 8 Hz, 2H), 7.23 (dd, J = 1 Hz, 5 Hz), 7.16 (dd, J = 1 Hz, J = 3 Hz, 1H), 7.09 (d, J = 1 Hz, J = 7 Hz, 1H), 7.05

(m, 2H), 2.44 (s, 3H).

*4-[5-(2,2'-Bithiophene)]-3,5-dimethyl-1-[(4-methylphenyl)sulfonyl]-1H-pyrazole (TsPz\*T<sub>2</sub>):*

A procedure similar to that used for the synthesis of TsPzT was used with reagents K<sub>2</sub>CO<sub>3</sub> (0.304 g, 2.20 mmol), 2,2'-bithiophene-5 boronic acid pinacol ester (0.292 g, 1.00 mmol), 3,5-dimethyl-4-iodo-1-[(4-methylphenyl)sulfonyl]-1H-pyrazole (0.376 g, 1.00 mmol), and Pd(PPh<sub>3</sub>)<sub>4</sub> (0.058 g, 0.050 mmol) to give an orange solid. The crude product was purified *via* column chromatography on silica with CH<sub>2</sub>Cl<sub>2</sub> as the eluent to give a light yellow solid in 49 % yield. *m/z*: 414. <sup>1</sup>H NMR (300 MHz, CDCl<sub>3</sub>): δ 7.91 (d, J = 8 Hz, 2H), 7.35 (d, J = 8 Hz, 2H), 7.23 (dd, J = 1 Hz, 5 Hz), 7.16 (dd, J = 1 Hz, J = 3 Hz, 1H), 7.14 (d, 3 Hz, 1H), 7.02 (dd, J = 3 Hz, J = 5 Hz, 1H), 6.81 (d, J = 3 Hz, 1H), 7.09 (d, J = 1 Hz, J = 7 Hz, 1H), 2.60 (s, 3H), 2.44 (s, 3H), 2.30 (s, 3H).

*1-Boc-4-[2-(3-hexylthienyl)]-1H-pyrazole (BocPz3HT):*

A degassed 3:1 THF/water (20 mL) solution of K<sub>2</sub>CO<sub>3</sub> (0.304 g, 2.20 mmol), 2-bromo-3-hexylthiophene (0.247 g, 1.00 mmol), 1-boc-pyrazole-4-boronic acid pinacol ester (0.294 g, 1.00 mmol), and PEPSI-IPr (0.0340 g, 0.0500 mmol) was heated to 50 °C for one day. The reaction mixture was cooled to room temperature and most of the THF was removed *in vacuo*. CH<sub>2</sub>Cl<sub>2</sub> (20 mL) was added to the resulting mixture and was washed with H<sub>2</sub>O (3 × 10 mL). The organic layer was dried over MgSO<sub>4</sub>, filtered, and the solvent was removed evaporated *in vacuo* to give a brown oil. The crude product was purified *via* column chromatography on silica gel with CH<sub>2</sub>Cl<sub>2</sub> (with 0.1 % triethylamine) as the eluent giving a light yellow oil in 52 % yield. *m/z*: 334. <sup>1</sup>H NMR (300 MHz, CDCl<sub>3</sub>): δ 8.14 (s, 1H), 7.83 (s, 1H), 7.19 (d, J = 5 Hz, 1H), 6.95 (d, J = 5 Hz, 1H), 2.65 (t, J = 8 Hz, 2H), 1.69 (s, 9H), 1.58 (m, 2H), 1.31 (m, 6H), 0.88 (t, J = 7 Hz, 3 H).

*1-Boc-3,5-dimethyl-4-[2-(3-hexylthienyl)]-1H-pyrazole (BocPz\*3HT):*

A procedure similar to that used for the synthesis of BocPz3HT was used with reagents K<sub>2</sub>CO<sub>3</sub> (0.304 g, 2.20 mmol), 2-bromo-3-hexylthiophene (0.247 g, 1.00 mmol), 1-boc-3,5-dimethyl-pyrazole-4-boronic acid pinacol ester (0.322 g, 1.00 mmol), and PEPSI-IPr (0.0340 g, 0.0500 mmol) to give a brown oil. The crude product was purified *via* column chromatography on silica gel with CH<sub>2</sub>Cl<sub>2</sub> (with 0.1 % triethylamine) as the eluent giving a light yellow oil in 44 % yield. *m/z*: 362. <sup>1</sup>H NMR (300 MHz, CDCl<sub>3</sub>): δ 7.30 (d, J = 5 Hz, 1H), 6.99 (d, J = 5 Hz, 1H), 2.36 (s, 3H), 2.34

(t, J = 8 Hz, 2H), 2.17 (s, 3H), 1.63 (s, 9H), 1.47 (m, 2H), 1.20 (m, 6H), 0.85 (t, J = 7 Hz, 3H).

*1-Boc-4-[5-(3,3'-dihexyl-2,2'-bithienyl)]-1H-pyrazole (BocPz3HT<sub>2</sub>):*

A procedure similar to that used for the synthesis of BocPz3HT was used with reagents K<sub>2</sub>CO<sub>3</sub> (0.304 g, 2.20 mmol), 5-bromo-3,3'-dihexyl-2,2'-bithiophene (0.413 g, 1.00 mmol), 1-boc-pyrazole-4-boronic acid pinacol ester (0.294 g, 1.00 mmol), and PEPPSI-IPr (0.0340 g, 0.0500 mmol) to give a brown oil. The crude product was purified *via* column chromatography on silica gel with CH<sub>2</sub>Cl<sub>2</sub> (with 0.1 % triethylamine) as the eluent giving a light yellow oil in 38 % yield. *m/z*: 500. <sup>1</sup>H NMR (300 MHz, CDCl<sub>3</sub>): δ 8.20 (s, 1H), 7.90 (s, 1H), 7.31 (d, J = 5 Hz, 1H), 7.04 (s, 1H), 6.97 (d, J = 5 Hz, 1H), 2.54 (t, J = 8 Hz, 2H), 2.48 (t, J = 8 Hz, 2H), 1.68 (s, 9H), 1.56 (m, 4H), 1.23 (m, 12H), 0.86 (m, 6H).

*1-Boc-4-[5-(3,3'-dihexyl-2,2'-bithienyl)]-3,5-dimethyl-1H-pyrazole (BocPz\*3HT<sub>2</sub>):*

A procedure similar to that used for the synthesis of BocPz3HT was used with reagents K<sub>2</sub>CO<sub>3</sub> (0.304 g, 2.20 mmol), 5-bromo-3,3'-dihexyl-2,2'-bithiophene (0.413 g, 1.00 mmol), 1-boc-3,5-dimethyl-pyrazole-4-boronic acid pinacol ester (0.322 g, 1.00 mmol), and PEPPSI-IPr (0.0340 g, 0.0500 mmol) to give a brown oil. The crude product was purified *via* column chromatography on silica gel with CH<sub>2</sub>Cl<sub>2</sub> (with 0.1 % triethylamine) as the eluent giving a light yellow oil in 36 % yield. *m/z*: 528. <sup>1</sup>H NMR (300 MHz, CDCl<sub>3</sub>): δ 7.30 (d, J = 5 Hz, 1H), 6.98 (d, J = 5 Hz, 1H), 6.80 (s, 1H), 2.61 (s, 3H), 2.58 (t, J = 8 Hz, 2H), 2.53 (t, J = 8 Hz, 2H), 2.37 (s, 3H), 1.67 (s, 9H), 1.57 (m, 4H), 1.27 (m, 12H), 0.86 (m, 6H).

*4-(2-Thienyl)-1H-pyrazole (HPzT):*

TsPzT (0.152 g, 0.500 mmol) was added to 2:1 MeOH/5 M NaOH (6 mL). The mixture was refluxed for five hours. Upon cooling the reaction mixture to room temperature, the reaction volume was reduced by half, 15 mL of CH<sub>2</sub>Cl<sub>2</sub> was added, and the organic layer was washed with (4 × 6 mL). The organic layer was dried over MgSO<sub>4</sub>, filtered, and dried *in vacuo* to give a white solid in 88 % yield. Crystals suitable for SCXRD were grown from slow evaporation of CH<sub>2</sub>Cl<sub>2</sub> to give colorless crystals of HPzT. *m/z*: 150. <sup>1</sup>H NMR (400 MHz, Acetone-d<sub>6</sub>): δ 11.86 (s, 1H), 7.88 (s, 2H), 7.27 (dd, 1 Hz, 5 Hz, 1H), 7.18 (dd, 1 Hz, 3 Hz, 1H), 7.03 (dd, 3 Hz, 5 Hz, 1H). <sup>13</sup>C NMR (100 MHz, Acetone-d<sub>6</sub>): δ 137.2, 137.0, 128.9, 124.1, 124.0, 123.6. FT-IR (cm<sup>-1</sup>): 3101 (m, br),

2930 (m, br), 2840 (w, br), 1589 (w), 1516 (w), 1494 (w), 1434 (w), 1386 (w), 1346 (m), 1213 (m), 1148 (m), 1045 (w), 1018 (m), 950 (m), 908 (w), 855 (m), 840 (s), 808 (s), 688 (vs), 657 (s), 619 (s), 576 (m), 559 (w), 498 (m), 405 (m) Elem Calc for C<sub>7</sub>H<sub>6</sub>N<sub>2</sub>S: C, 55.98; H, 4.03; N, 18.65. Found: C, 55.51; H, 4.16; N, 17.85.

*3,5-Dimethyl-4-(2-thienyl)-1H-pyrazole (HPz\*T):*

A procedure similar to that used for the synthesis of HPzT was used with 3,5-dimethyl-4-iodo-1-[(4-methylphenyl)sulfonyl]-1H-pyrazole (0.199 g, 0.600 mmol). A white solid was obtained in 93 % yield. Crystals suitable for SCXRD were grown from layering hexanes on a solution of HPz\*T in CH<sub>2</sub>Cl<sub>2</sub>. *m/z*: 178. <sup>1</sup>H NMR (400 MHz, Acetone-d<sub>6</sub>): δ 11.59 (s, 1H), 7.38 (dd, J = 1 Hz, J = 6 Hz, 1H), 7.10 (dd, J = 3 Hz, J = 5 Hz, 1H), 6.99 (dd, J = 1 Hz, J = 6 Hz, 1H), 2.31 (s, 6H). <sup>13</sup>C NMR (100 MHz, Acetone-d<sub>6</sub>): δ 132.2, 128.7, 125.3, 124.5, 122.0, 113.7, 30.0. FT-IR (cm<sup>-1</sup>): 3156 (w, br), 3101 (m), 3063 (m), 3020 (m), 2921 (m, br), 2829 (m, br), 1588 (w), 1550 (m), 1496 (w), 1433 (m), 1415 (m), 1304 (q), 1249 (m), 1209 (w), 1157 (w), 1053 (w), 1034 (m), 1002 (w), 942 (m), 819 (m, br), 698 (s), 686 (s), 631 (m), 587 (w), 517 (m), 476 (w). Calc for C<sub>9</sub>H<sub>10</sub>N<sub>2</sub>S: C, 60.64; H, 5.65; N, 15.72. Found: C, 60.63; H, 5.53; N, 15.65.

*4-[5-(2,2'-Bithienyl)]-1H-pyrazole (HPzT<sub>2</sub>):*

A procedure similar to that used for the synthesis of HPzT was used with TsPzT<sub>2</sub> (0.154 g, 0.400 mmol), and 30 mL CH<sub>2</sub>Cl<sub>2</sub> was used to extract HPzT<sub>2</sub>. The crude product was *via* centrifugation thrice in 1:1 CH<sub>2</sub>Cl<sub>2</sub>/hexanes to give a yellow solid in 92 % yield. *m/z*: 232. <sup>1</sup>H NMR (Acetone-d<sub>6</sub>): δ 7.93 (s, 2H), 7.39 (d, J = 5 Hz, 1H), 7.24 (d, J = 3 Hz, 1H), 7.18 (d, J = 4 Hz, 1H), 7.14 (d, J = 4 Hz, 1H), 7.07 (dd, J = 3 Hz, J = 5 Hz, 1H). <sup>13</sup>C NMR (100 MHz, Acetone-d<sub>6</sub>): 135.5, 133.7, 129.0, 126.6, 126.2, 125.3, 124.3, 124.1, 123.1. δ FT-IR (cm<sup>-1</sup>): 3103 (m, br), 2927 (m, br), 1513 (m), 1427 (m), 1381 (m), 1348 (m), 1331 (w), 1197 (w), 1145 (m), 1045 (w), 1014 (m), 950 (m), 909 (w), 862 (w), 835 (s), 818 (w), 796 (vs), 700 (s), 658 (m), 623 (m), 541 (m), 479 (m). Elem Calcd for C<sub>11</sub>H<sub>8</sub>N<sub>2</sub>S<sub>2</sub>: C, 56.87; H, 3.47; N, 12.06. Found C, 56.52; H, 3.52; N, 11.70.

*4-[5-(2,2'-Bithienyl)]-3,5-dimethyl-1H-pyrazole (HPz\*T<sub>2</sub>):*

A procedure similar to that used for the synthesis of HPzT was used with TsPz\*T<sub>2</sub> (0.166 g, 0.400 mmol), and 30 mL CH<sub>2</sub>Cl<sub>2</sub> was used to extract HPz\*T<sub>2</sub>. The crude product was *via*

centrifugation thrice in 1:1 CH<sub>2</sub>Cl<sub>2</sub>/hexanes to give a yellow solid in 89 % yield. *m/z*: 260. <sup>1</sup>H NMR (400 MHz, Acetone-d<sub>6</sub>) δ 11.64 (s, 1H), 7.39 (dd, *J* = 1 Hz, *J* = 6 Hz, 1H), 7.27 (dd, *J* = 1 Hz, *J* = 6 Hz, 1H), 7.24 (d, *J* = 5 Hz, 1H), 7.07 (dd, *J* = 3 Hz, *J* = 5 Hz, 1H), 6.95 (d, *J* = 4 Hz, 1H), 2.36 (s, 6H). <sup>13</sup>C NMR (100 MHz, Acetone-d<sub>6</sub>): δ 136.5, 135.9, 129.7, 129.0, 126.1, 125.3, 125.0, 124.2, 124.0, 111.6, 30.2. FT-IR (cm<sup>-1</sup>): 3055 (m, br), 2917 (m, br), 1581 (m), 1553 (w), 1521 (m), 1452 (w), 1413 (m), 1378 (w), 1298 (m), 1256 (m), 1219 (w), 1149 (w), 1034 (m), 1007 (w), 979 (w), 944 (m), 881 (w), 831 (m), 796 (vs), 779 (s), 686 (vs), 637 (m), 575 (w), 542 (m), 502 (w), 474 (m), 427 (m). Elem Calc for C<sub>13</sub>H<sub>12</sub>N<sub>2</sub>S<sub>2</sub>: C, 59.97; H, 4.65; N, 10.76. Found: C, 59.85; H, 4.51; N, 10.46.

*4-[2-(3-Hexylthienyl)]-1H-pyrazole (HPz3HT):*

BocPz3HT (0.167 g, 0.500 mmol) was dissolved in 2:1 MeOH/4 M HCl (6 mL) and heated to 60 °C for two hours. Upon cooling the reaction mixture to room temperature, the volume was reduced by half, 8 mL of CH<sub>2</sub>Cl<sub>2</sub> was added, and the organic layer was washed with H<sub>2</sub>O (4 × 5 mL). The organic layer was dried over MgSO<sub>4</sub>, filtered, and dried *in vacuo* to give a yellow oil in 89 % yield. *m/z*: 234. <sup>1</sup>H NMR (400 MHz, CDCl<sub>3</sub>): δ 7.76 (s, 2H), 7.15 (d, 5 Hz, 1H), 6.95 (d, 5 Hz, 1H), 2.65 (t, 8 Hz, 2H), 1.62 (m, 2H), 1.29 (m, 6H), 0.88 (t, *J* = 7 Hz, 3H). <sup>13</sup>C NMR (100 MHz, CDCl<sub>3</sub>): δ 147.6, 138.8, 133.0, 129.5, 122.7, 119.0, 31.7, 30.6, 29.2, 29.0, 22.6, 14.1. FT-IR (cm<sup>-1</sup>): 3160 (m, br), 2953 (s), 2923 (vs), 2854 (s), 1592 (w), 1464 (m), 1367 (m), 1259 (w), 1144 (m), 1067 (w), 1023 (s), 947 (m), 912 (m), 855 (m), 836 (w), 799 (m), 721 (w), 662 (m), 625 (m), 505 (m). Elem Calc for C<sub>13</sub>H<sub>18</sub>N<sub>2</sub>S: C, 66.62; H, 7.74; N, 11.95. Found: C, 65.45; H, 8.36; N, 11.28.

*4-[2-(3-Hexylthienyl)]-3,5-dimethyl-1H-pyrazole (HPz\*3HT):*

A procedure similar to that used for the synthesis of HPz3HT was used with BocPz\*3HT (0.152 g, 0.420 mmol). A yellow oil was obtained in 92 % yield. *m/z*: 262. <sup>1</sup>H NMR (400 MHz, CD<sub>2</sub>Cl<sub>2</sub>) δ 9.67 (s, 1H), 7.28 (d, *J* = 5 Hz, 1H), 7.02 (d, *J* = 5 Hz, 1H), 2.40 (t, *J* = 7 Hz, 2H), 2.20 (s, 6H), 1.51 (m, 2H), 1.21 (m, 6H), 0.84 (t, *J* = 7 Hz, 3H). <sup>13</sup>C (100 MHz, CD<sub>2</sub>Cl<sub>2</sub>): δ 144.3, 141.9, 129.1, 128.6, 125.0, 111.1, 32.2, 31.1, 29.6, 29.1, 23.2, 14.4, 11.6. FT-IR (cm<sup>-1</sup>): 3172 (m), 3127 (w), 3063 (w), 2953 (s), 2922 (vs), 2854 (s), 1596 (w), 1553 (w), 1455 (m), 1376 (m), 1307 (m), 1259 (w), 1154 (m), 1042 (m), 1000 (w), 834 (m), 777 (m), 718 (s), 686 (m), 653 (m), 531 (m), 457 (w). Elem Calc for C<sub>15</sub>H<sub>22</sub>N<sub>2</sub>S: C, 68.66; H, 8.45; N, 10.68. Found: C, 67.57; H, 8.59;

N, 11.14.

*4-[5-(3,3'-Dihexyl-2,2'-bithienyl)]-1H-pyrazole (HPz3HT<sub>2</sub>):*

A procedure similar to that used for the synthesis of HPz3HT was used with BocPz3HT<sub>2</sub> (0.175 g, 0.350 mmol). A yellow oil was obtained in 82 % yield. *m/z*: 400. <sup>1</sup>H NMR (400 MHz, CDCl<sub>3</sub>) δ 7.82 (s, 2H), 7.30 (d, *J* = 5 Hz, 1H), 6.98 (s, 1H), 6.97 (d, *J* = 5 Hz, 1H), 2.55 (t, *J* = 8 Hz, 2H), 2.49 (t, *J* = 8 Hz, 2H), 1.56 (m, 4H), 1.25 (m, 12H), 0.86 (m, 6H). <sup>13</sup>C NMR (100 MHz, CDCl<sub>3</sub>): δ 143.1, 142.4, 135.4, 131.0, 128.6, 128.5, 126.7, 125.3, 124.5, 123.1, 31.6, 30.7, 30.6, 29.7, 29.1, 29.0, 28.9, 28.8, 22.6, 14.1. FT-IR (cm<sup>-1</sup>): 2955 (m), 2921 (s), 2852 (s), 1588 (m), 1521 (w), 1456 (m), 1372 (m), 1260 (s), 1196 (w), 1094 (s), 1040 (s), 1020 (s), 873 (w), 818 (s), 801 (s), 692 (m), 641 (m). Elem Calc for C<sub>23</sub>H<sub>32</sub>N<sub>2</sub>S<sub>2</sub>: C, 68.95; H, 8.05; N, 6.99. Found: C, 68.73; H, 8.21; N, 7.15.

*4-[5-(3,3'-Dihexyl-2,2'-bithienyl)]-3,5-dimethyl-1H-pyrazole (HPz\*3HT<sub>2</sub>):*

A procedure similar to that used for the synthesis of HPz3HT was used with BocPz\*3HT<sub>2</sub> (0.158 g, 0.300 mmol). A yellow oil was obtained in 87 % yield. *m/z*: 428. <sup>1</sup>H NMR (400 MHz, CDCl<sub>3</sub>) δ 7.29 (d, *J* = 5 Hz, 1H), 6.97 (d, *J* = 5 Hz, 1H), 6.83 (s, 1H), 2.56 (t, *J* = 8 Hz, 2H), 2.52 (t, *J* = 8 Hz, 2H), 2.43 (s, 6H), 1.57 (m, 4H), 1.28 (m, 12H), 0.86 (m, 6H). <sup>13</sup>C NMR (100 MHz, CDCl<sub>3</sub>): δ 142.5, 142.4, 142.3, 136.3, 134.7, 127.4, 126.5, 125.3, 124.0, 31.6, 30.7, 30.2, 29.7, 29.1, 29.0, 28.9, 28.8, 22.6, 14.0, 12.2. FT-IR (cm<sup>-1</sup>): 3188 (w), 3064 (w), 2954 (s), 2922 (vs), 2853 (s), 1586 (w), 1539 (w), 1509 (w), 1456 (m), 1415 (w), 1377 (m), 1303 (w), 1261 (m), 1157 (w), 1086 (m), 1014 (m), 833 (m), 798 (s), 738 (s), 660 (w). Elem Calc for C<sub>25</sub>H<sub>36</sub>N<sub>2</sub>S<sub>2</sub>: C, 70.04; H, 8.46; N, 6.53. Found: C, 70.36; H, 8.81; N, 6.22.

*tris-(μ-N,N'-(4-(2-Thienyl)pyrazolato)trigold(I)) (AuPzT):*

AuCl(tht) (0.320 g, 1.00 mmol) and HPzT (0.150 g, 1.00 mmol) were dissolved in 1:1 MeOH/-THF. Slow diffusion of triethylamine in 1:1 MeOH/THF over three days afforded colorless needles of AuPzT suitable for SCXRD in 41% yield. *m/z*: 1038. FT-IR (cm<sup>-1</sup>), 3111 (w), 2961 (w), 1584 (m), 1391 (m), 1358 (m), 1316 (m), 1258 (m), 1217 (m), 1179 (w), 1106 (s), 1076 (m), 1052 (m), 1034 (m), 911 (m), 818 (s), 701 (s), 686 (s), 650 (m), 632 (m), 578 (w), 504 (m), 454 (m). Elem Calcd for C<sub>21</sub>H<sub>15</sub>N<sub>6</sub>S<sub>3</sub>Au: C, 24.29; H, 1.46; N, 8.09. Found C, 25.02; H, 2.03; N, 7.99.

*tris-(μ-N,N'-(4-(2-Thienyl)3,5-dimethylpyrazolato)trigold(I)) (AuPz\*T):*

AuCl(tht) (0.320 g, 1.00 mmol) and HPz\*T (0.150 g, 1.00 mmol) were dissolved in 1:1 MeOH/-THF. Slow diffusion of triethylamine in 1:1 MeOH/THF over two days afforded a white microcrystalline powder of AuPz\*T in 43 % yield. *m/z*: 1122. FT-IR (cm<sup>-1</sup>): 2956 (m) 2908 (m), 2971 (m), 1557 (m), 1505 (m), 1430 (s) 1373 (m), 1316 (w), 1258 (m), 1233 (m), 1215 (w), 1156 (m), 1120 (w), 1022 (m), 1003 (m), 952 (m), 846 (m), 806 (m), 770 (w), 686 (s), 675 (s), 621 (w), 601 (w), 581 (w), 559 (w), 497 (m), 462 (m). Elem Calcd for C<sub>27</sub>H<sub>27</sub>N<sub>6</sub>S<sub>3</sub>Au<sub>3</sub>: C, 28.89; H, 2.42; N, 7.49. Found: C, 29.32; H, 2.21; N 7.68.

*tris-(μ-N,N'-(4-[5-(2,2'-Bithienyl)]pyrazolato)trigold(I)) (AuPzT<sub>2</sub>):*

AuCl(tht) (0.320 g, 1.00 mmol) and HPzT<sub>2</sub> (0.232 g, 1.00 mmol) were dissolved in 1:1 MeOH/-THF. Slow diffusion of triethylamine in 1:1 MeOH/THF over five days afforded gold feathered crystals of AuPzT<sub>2</sub> in 39 % yield. *m/z*: 1284. FT-IR (cm<sup>-1</sup>): 3108 (w), 2847 (w), 1584 (m), 1539 (w), 1463 (w), 1423 (w), 1387 (m), 1346 (m), 1293 (w), 1258 (w), 1173 (m), 1102 (m), 1053 (m), 1028 (m), 913 (m), 878 (w), 817 (m), 802 (m), 780 (s), 686 (s), 636 (m), 535 (m), 476 (m), 432 (m). Elem Calcd for C<sub>33</sub>H<sub>21</sub>N<sub>6</sub>S<sub>6</sub>Au<sub>3</sub>: C, 30.85; H, 1.65; N, 6.54. Found: C, 30.63; H, 1.78; N, 6.30.

*tris-(μ-N,N'-(4-[5-(2,2'-Bithienyl)]3,5-dimethylpyrazolato)trigold(I)) (AuPz\*T<sub>2</sub>):*

AuCl(tht) (0.320 g, 1.00 mmol) and HPz\*T<sub>2</sub> (0.260 g, 1.00 mmol) were dissolved in 1:1 MeOH/-THF. Slow diffusion of triethylamine in 1:1 MeOH/THF over one week afforded a yellow powder of AuPz\*T<sub>2</sub> in 36 % yield. *m/z*: 1368. FT-IR (cm<sup>-1</sup>): 3066 (w), 2910 (w), 1565 (m), 1532 (m), 1490 (w), 1424 (m), 1372 (m), 1308 (w), 1263 (m), 1223 (w), 1199 (w), 1104 (w), 1045 (w), 1001 (m), 951 (m), 837 (s), 817 (w), 784 (s), 740 (w), 683 (vs), 634 (w), 581 (m), 478 (s). Elem Calcd for C<sub>39</sub>H<sub>33</sub>N<sub>6</sub>S<sub>6</sub>Au<sub>3</sub>: C, 34.22; H, 2.43; N, 6.14. Found: C, 34.36; H, 2.27; N, 5.81.

*tris-(μ-N,N'-(4-[2-(3-Hexylthienyl)]pyrazolato)trigold(I)) (AuPz3HT):*

AuCl(tht) (0.032 g, 0.10 mmol) and HPz3HT (0.023 g, 0.10 mmol), and triethylamine (14 μL, 0.10 mmol) were dissolved in THF (15 mL) and stirred at room temperature for 20 minutes.



The reaction was evaporated to dryness, and the resulting residue was suspended in hexanes and centrifuged. The supernatant was collected, evaporated to dryness, and purified *via* column chromatography on silica with 4:1 hexanes:CH<sub>2</sub>Cl<sub>2</sub> as the eluent to give a white solid in 62 % yield. *m/z*: 1290 (100 %), 2578 (18 %). <sup>1</sup>H NMR (400 MHz, CDCl<sub>3</sub>): δ 7.46 (s, 6H), 7.10 (d, J = 5 Hz, 3H), 6.91 (d, J = 5 Hz, 3H), 2.58 (t, J = 8 Hz, 6H), 1.58 (m, 6H), 1.30 (m, 18H), 0.90 (m, 9H). <sup>13</sup>C NMR (100 MHz, CDCl<sub>3</sub>): δ 138.1, 138.0, 129.5, 128.3, 122.2, 115.7, 31.8, 30.5, 29.7, 29.1, 22.7, 14.2. FT-IR (cm<sup>-1</sup>): 2955 (s), 2921 (vs), 2851 (vs), 1580 (w), 1522 (w), 1463 (m), 1390 (w), 1361 (w), 1338 (w), 1260 (m), 1180 (w), 1084 (s), 1041 (m), 915 (w), 820 (m), 802 (s), 730 (w), 691 (w), 647 (m). Elem Calcd for C<sub>39</sub>H<sub>51</sub>N<sub>6</sub>S<sub>3</sub>Au<sub>3</sub>: C, 36.29; H, 3.98; N, 6.51. Found: C, 35.99; H, 3.72; N, 6.84.

*tris-(μ-N,N'-(4-[2-(3-Hexylthienyl)]3,5-dimethylpyrazolato)trigold(I)) (AuPz\*3HT):*

AuCl(tht) (0.032 g, 0.1 mmol), HPz\*3HT (0.028 g, 0.11 mmol), and triethylamine (14 μL, 0.10 mmol) were dissolved in THF (5 mL) and stirred at room temperature for one hour. The reaction mixture was evaporated to dryness, and the resulting residue was dissolved in CH<sub>2</sub>Cl<sub>2</sub> (5 mL) and washed with H<sub>2</sub>O (2 × 3 mL). The organic layer was dried over MgSO<sub>4</sub>, filtered, and evaporated to dryness. The crude white solid was purified *via* column chromatography on silica with 4:1 hexanes:CH<sub>2</sub>Cl<sub>2</sub> as the eluent to give a white solid in 84 %. Colorless crystals of AuPz\*3HT suitable for SCXRD were grown from layering methanol on a CHCl<sub>3</sub> solution. *m/z*: 1347. <sup>1</sup>H NMR (300 MHz, CDCl<sub>3</sub>): δ 7.26 (d, J = 5 Hz, 3H), 6.97 (d, J = 5 Hz, 3H), 2.33 (t, J = 8 Hz, 6H), 2.08 (s, 18H), 1.44 (m, 6H), 1.19 (m, 18H), 0.84 (m, 9H). <sup>13</sup>C NMR (100 MHz, CDCl<sub>3</sub>): δ 147.6, 141.1, 128.7, 128.4, 124.3, 110.4, 31.7, 30.6, 29.7, 29.1, 22.6, 12.5. FT-IR (cm<sup>-1</sup>): 2955 (m), 2922 (vs), 2852 (s), 1580 (w), 1500 (w), 1463 (m), 1375 (m), 1260 (m), 1172 (w), 1093 (m, br), 1016 (m), 958 (w), 873 (w), 799 (s), 722 (m), 704 (m), 684 (w), 659 (m), 571 (m), 468 (w). Elem Calcd for C<sub>45</sub>H<sub>63</sub>N<sub>6</sub>S<sub>3</sub>Au<sub>3</sub>: C, 39.31; H, 4.62; N, 6.11. Found C, 39.50; H, 4.12; N, 6.42.

*tris-(μ-N,N'-(4-[5-(3,3'-Dihexyl-2,2'-bithienyl)]pyrazolato)trigold(I)) (AuPz3HT<sub>2</sub>):*

AuCl(tht) (0.032 g, 0.10 mmol) and HPz3HT<sub>2</sub> (0.040 g, 1 mmol), and triethylamine (14 μL, 0.1 mmol) were dissolved in THF (15 mL) and stirred at room temperature for one hour. The reaction was evaporated to dryness, and the resulting residue was suspended in hexanes (10 mL) and centrifuged. The supernatant was collected, evaporated to dryness, and purified *via* column chromatography on silica with 4:1 hexanes:CH<sub>2</sub>Cl<sub>2</sub> as the eluent to give a white solid in 86 %

yield.  $m/z$ : 1788.  $^1\text{H}$  NMR (300 MHz,  $\text{CDCl}_3$ ):  $\delta$  7.51 (s, 6H), 7.28 (d,  $J$  = 5 Hz, 3H), 6.97 (d,  $J$  = 5 Hz, 3H), 6.88 (s, 3H), 2.56 (t,  $J$  = 8 Hz, 6H), 2.46 (t,  $J$  = 8 Hz, 6H), 1.54 (m, 12H), 1.25 (m, 36H), 0.86 (m, 18H).  $^{13}\text{C}$  NMR (100 MHz,  $\text{CDCl}_3$ ):  $\delta$  136.8, 135.8, 134.6, 128.6, 128.5, 128.4, 125.5, 125.3, 123.9, 117.0. FT-IR ( $\text{cm}^{-1}$ ): 2955 (s), 2922 (vs), 2854 (s), 1588 (m), 1520 (w), 1461 (m), 1399 (w), 1371 (m), 1318 (w), 1262 (s), 1173 (w), 1095 (s), 1041 (vs), 1024 (s), 929 (w), 874 (m), 820 (vs), 801 (vs), 719 (m), 694 (w), 642 (m), 567 (m). Elem Calcd for  $\text{C}_{69}\text{H}_{93}\text{N}_6\text{S}_6\text{Au}_3$ : C, 46.30; H, 5.24; N, 4.70. Found C, 46.39; H, 4.91; N, 4.85.

*tris-( $\mu$ -N,N'-(4-[5-(3,3'-Dihexyl-2,2'-bithienyl)]3,5-dimethylpyrazolato)trigold(I)) (AuPz\*3HT<sub>2</sub>):*

AuCl(tht) (0.032 g, 0.10 mmol) and HPz\*3HT<sub>2</sub> (0.043 g, 0.11 mmol), and triethylamine (14  $\mu\text{L}$ , 0.1 mmol) were dissolved in THF (15 mL) and stirred at room temperature for one hour. The reaction was evaporated to dryness, and the resulting residue was suspended in hexanes (15 mL) and centrifuged. The supernatant was collected, evaporated to dryness, and purified *via* column chromatography on silica with 4:1 hexanes: $\text{CH}_2\text{Cl}_2$  as the eluent to give a white solid in 87 % yield.  $m/z$ : 1872.  $^1\text{H}$  NMR (300 MHz,  $\text{CDCl}_3$ ):  $\delta$  7.28 (d,  $J$  = 5.4 Hz, 3H), 6.97 (d,  $J$  = 5.4 Hz, 3H), 6.76 (s, 3H), 2.56 (t,  $J$  = 8.1 Hz, 6H), 2.51 (t,  $J$  = 8.1 Hz, 6H), 2.28 (s, 18H), 1.54 (m, 12H), 1.25 (m, 36H), 0.86 (m, 18H).  $^{13}\text{C}$  NMR (100 MHz,  $\text{CDCl}_3$ ):  $\delta$  145.5, 142.2, 142.1, 136.3, 128.5, 126.3, 125.6, 125.1, 111.7, 31.7, 31.6, 30.8, 30.7, 30.3, 29.2, 29.1, 29.0, 28.9, 22.6, 22.5, 14.1, 13.6. FT-IR ( $\text{cm}^{-1}$ ): 2954 (s), 2922 (vs), 2853 (s), 1573 (w), 1546 (m), 1501 (m), 1450 (m), 1426 (s), 1374 (s), 1361 (m), 1361 (m), 1198 (w), 1086 (m), 1033 (m), 920 (w), 874 (w), 832 (m), 802 (s), 757 (w), 722 (m), 651 (m), 592 (w), 478 (m). Elem Calcd for  $\text{C}_{75}\text{H}_{105}\text{N}_6\text{S}_6\text{Au}_3$ : C, 48.07; H, 5.65; N, 4.48. Found: C, 48.23; H, 5.31; N, 4.40.

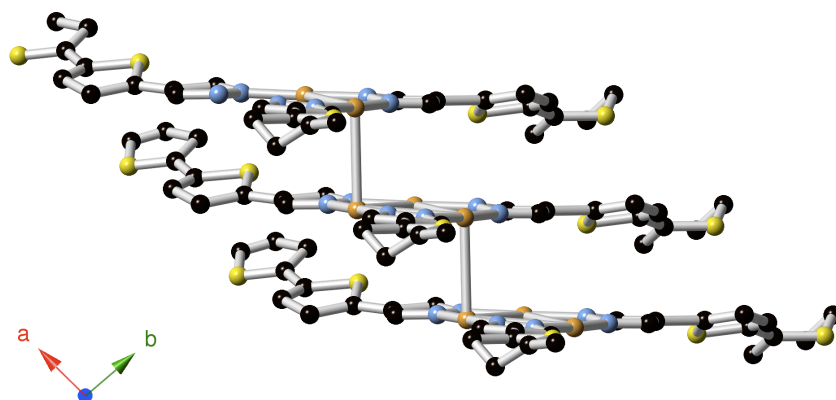

Figure S1: Preliminary solid state molecular structure of AuPzT<sub>2</sub> viewed along the *c*-axis.

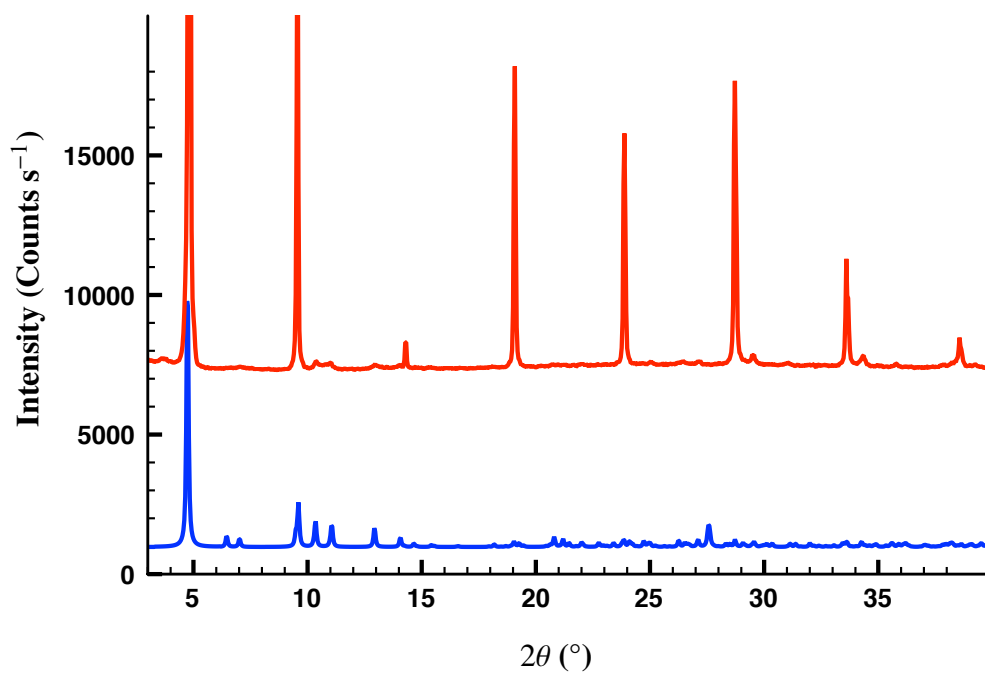

Figure S2: Experimental (red) and predicted (blue) PXRD patterns of AuPzT<sub>2</sub>. Space group: P-1.  
a: 4.8896(15) Å; b: 18.522(6) Å; c: 18.700(6) Å;  $\alpha$ : 94.701(4)°;  $\beta$ : 91.002(4)°;  $\gamma$ : 93.964(6)°.

Table S1: Selected crystallographic data for AuPzT and AuPz\*3HT.

|                                                | AuPzT                                                                         | AuPz*3HT                                                                      |
|------------------------------------------------|-------------------------------------------------------------------------------|-------------------------------------------------------------------------------|
| Formula                                        | C <sub>21</sub> H <sub>15</sub> N <sub>6</sub> S <sub>3</sub> Au <sub>3</sub> | C <sub>45</sub> H <sub>63</sub> N <sub>6</sub> S <sub>3</sub> Au <sub>3</sub> |
| Crystal color, shape                           | colorless, needle                                                             | colorless, plate                                                              |
| Dimensions / mm                                | 0.36 × 0.05 × 0.02                                                            | 0.21 × 0.10 × 0.02                                                            |
| Temperature / K                                | 90                                                                            | 90                                                                            |
| Crystal system                                 | Orthorhombic                                                                  | Monoclinic                                                                    |
| Space group                                    | Pca2 <sub>1</sub>                                                             | C2/c                                                                          |
| a / Å                                          | 25.9877(14)                                                                   | 34.404(5)                                                                     |
| b / Å                                          | 3.4134(8)                                                                     | 22.375(3)                                                                     |
| c / Å                                          | 6.8232(4)                                                                     | 13.0426(19)                                                                   |
| $\alpha$ / deg                                 | 90                                                                            | 90                                                                            |
| $\beta$ / deg                                  | 90                                                                            | 103.142(2)                                                                    |
| $\gamma$ / deg                                 | 90                                                                            | 90                                                                            |
| V / Å <sup>3</sup>                             | 2378.5(2)                                                                     | 9777(2)                                                                       |
| Z                                              | 4                                                                             | 8                                                                             |
| 2 $\theta$ (max) / deg                         | 54.71                                                                         | 50.63                                                                         |
| Total reflections                              | 17988                                                                         | 36578                                                                         |
| Unique reflections                             | 5148                                                                          | 8908                                                                          |
| $\rho_{calc}$ / g cm <sup>-3</sup>             | 2.900                                                                         | 1.868                                                                         |
| $\mu$ (k $\alpha$ ) / mm <sup>-1</sup>         | 18.746                                                                        | 9.145                                                                         |
| R1 <sup>a</sup> (I>2.00 $\sigma$ (I))          | 0.0409                                                                        | 0.0612                                                                        |
| $\omega$ R2 <sup>a</sup> (I>2.00 $\sigma$ (I)) | 0.0750                                                                        | 0.1969                                                                        |
| Goodness of fit                                | 1.042                                                                         | 1.061                                                                         |

<sup>a</sup> Function minimized.  $\Sigma\omega(|F_o|-|F_c|)^2$ ,  $R1=\Sigma ||F_o|-|F_c||/\Sigma|F_o|$ ,  $\omega R2=[\Sigma(\omega(|F_o|-|F_c|)^2)/\Sigma\omega(|F_o|)^2]^{1/2}$

Table S2: Total calculated bond energies of complex AuPzT

| Compound               | Energy (eV)   |
|------------------------|---------------|
| Ground state, monomer  | -305.85388037 |
| Excited state, monomer | -303.26534755 |
| Ground state, dimer    | -611.60236759 |

Table S3: Atomic coordinates for the optimized ground state geometry of AuPzT (monomer)

| Atom | X (Å)     | Y (Å)     | Z (Å)     |
|------|-----------|-----------|-----------|
| 1.H  | 4.385291  | -1.789667 | -0.069535 |
| 2.C  | 3.165732  | -3.689226 | -0.092745 |
| 3.C  | 1.763214  | -3.754956 | -0.088400 |
| 4.H  | 1.108861  | -4.617782 | -0.094234 |
| 5.C  | 4.127783  | -4.776762 | -0.118644 |
| 6.C  | 5.470138  | -4.752457 | 0.206821  |
| 7.H  | 5.973313  | -3.856815 | 0.561782  |
| 8.C  | 6.113573  | -6.008723 | 0.058113  |
| 9.H  | 7.165250  | -6.180699 | 0.272651  |
| 10.C | 5.262981  | -6.993281 | -0.378227 |
| 11.H | 5.476751  | -8.038341 | -0.571172 |
| 12.C | -3.727284 | -1.821977 | -0.089077 |
| 13.H | -3.756803 | -2.903344 | -0.122265 |
| 14.C | -4.778606 | -0.890274 | -0.088098 |
| 15.C | -4.126433 | 0.352208  | -0.057899 |
| 16.H | -4.540541 | 1.352554  | -0.035822 |
| 17.C | -6.205280 | -1.160579 | -0.112212 |
| 18.C | -6.873650 | -2.330369 | 0.193142  |
| 19.H | -6.363134 | -3.229277 | 0.528816  |
| 20.C | -8.282775 | -2.231444 | 0.055805  |
| 21.H | -8.970372 | -3.048254 | 0.260104  |
| 22.C | -8.692137 | -0.986911 | -0.352357 |
| 23.H | -9.699399 | -0.628296 | -0.530550 |
| 24.S | -7.347431 | 0.067885  | -0.586832 |
| 25.C | 0.281871  | 4.128662  | -0.079196 |
| 26.H | -0.643461 | 4.689173  | -0.109793 |

Table S3 (Continued)

|       |           |           |           |
|-------|-----------|-----------|-----------|
| 27.C  | 1.611653  | 4.581111  | -0.091291 |
| 28.C  | 2.368252  | 3.398744  | -0.055697 |
| 29.H  | 3.442382  | 3.261989  | -0.041493 |
| 30.C  | 2.074931  | 5.956498  | -0.134075 |
| 31.C  | 1.366135  | 7.115317  | 0.118051  |
| 32.H  | 0.322502  | 7.112865  | 0.421435  |
| 33.C  | 2.136790  | 8.297029  | -0.034925 |
| 34.H  | 1.748528  | 9.299384  | 0.126759  |
| 35.C  | 3.434721  | 8.041997  | -0.400262 |
| 36.H  | 4.240419  | 8.744912  | -0.578359 |
| 37.S  | 3.715707  | 6.348447  | -0.571667 |
| 38.N  | 2.282597  | -1.618723 | -0.039979 |
| 39.N  | 1.247103  | -2.510876 | -0.058869 |
| 40.N  | -2.545484 | -1.176213 | -0.059451 |
| 41.N  | -2.792442 | 0.168341  | -0.042196 |
| 42.N  | 0.257606  | 2.783197  | -0.038501 |
| 43.N  | 1.547254  | 2.331146  | -0.026228 |
| 44.S  | 3.668122  | -6.381589 | -0.619910 |
| 45.Au | -0.653311 | -1.854588 | -0.056932 |
| 46.Au | -1.273192 | 1.481945  | -0.033368 |
| 47.Au | 1.925748  | 0.357838  | -0.021619 |
| 48.C  | 3.437017  | -2.311326 | -0.062518 |

Table S4: Atomic coordinates for the optimized lowest energy triplet excited state,  $1^3A$  geometry of AuPzT (monomer)

| Atom | X (Å)    | Y (Å)     | Z (Å)    |
|------|----------|-----------|----------|
| 1.H  | 4.425163 | -1.700725 | 0.012286 |
| 2.C  | 3.240600 | -3.651393 | 0.059269 |
| 3.C  | 1.810323 | -3.725733 | 0.052423 |
| 4.H  | 1.168194 | -4.596541 | 0.071975 |
| 5.C  | 4.163277 | -4.692703 | 0.093119 |
| 6.C  | 5.627581 | -4.616415 | 0.101601 |
| 7.H  | 6.154970 | -3.667186 | 0.082953 |

Table S4 (Continued)

|      |           |           |           |
|------|-----------|-----------|-----------|
| 8.C  | 6.227160  | -5.840528 | 0.136201  |
| 9.H  | 7.303659  | -5.994969 | 0.147648  |
| 10.C | 5.307310  | -6.935368 | 0.156726  |
| 11.H | 5.546159  | -7.992444 | 0.186330  |
| 12.C | -3.680325 | -1.884063 | 0.042370  |
| 13.H | -3.682309 | -2.965664 | 0.080698  |
| 14.C | -4.754226 | -0.979104 | 0.038174  |
| 15.C | -4.133735 | 0.279623  | 0.003316  |
| 16.H | -4.572730 | 1.269248  | -0.022420 |
| 17.C | -6.173309 | -1.286076 | 0.062435  |
| 18.C | -6.811093 | -2.471856 | -0.246665 |
| 19.H | -6.277681 | -3.356469 | -0.584778 |
| 20.C | -8.222352 | -2.409405 | -0.109590 |
| 21.H | -8.888727 | -3.243077 | -0.315910 |
| 22.C | -8.663134 | -1.176820 | 0.302291  |
| 23.H | -9.679039 | -0.844428 | 0.482272  |
| 24.S | -7.346141 | -0.088535 | 0.539943  |
| 25.C | 0.222907  | 4.137828  | -0.054784 |
| 26.H | -0.708340 | 4.688949  | -0.033986 |
| 27.C | 1.547787  | 4.605491  | -0.055995 |
| 28.C | 2.317345  | 3.431603  | -0.065934 |
| 29.H | 3.392962  | 3.307027  | -0.079440 |
| 30.C | 1.997339  | 5.986109  | -0.042464 |
| 31.C | 1.278629  | 7.132510  | -0.321865 |
| 32.H | 0.236395  | 7.113816  | -0.629519 |
| 33.C | 2.037725  | 8.324332  | -0.191319 |
| 34.H | 1.641101  | 9.319289  | -0.376805 |
| 35.C | 3.336606  | 8.089416  | 0.184197  |
| 36.H | 4.135083  | 8.803653  | 0.349364  |
| 37.S | 3.632580  | 6.402761  | 0.393505  |
| 38.N | 2.323920  | -1.576965 | -0.000575 |
| 39.N | 1.291653  | -2.489150 | 0.019283  |
| 40.N | -2.514988 | -1.208546 | 0.009703  |
| 41.N | -2.795620 | 0.129544  | -0.012144 |
| 42.N | 0.213070  | 2.791631  | -0.063851 |
| 43.N | 1.508361  | 2.353899  | -0.068751 |
| 44.S | 3.631322  | -6.415905 | 0.133741  |

Table S4 (Continued)

|       |           |           |           |
|-------|-----------|-----------|-----------|
| 45.Au | -0.611535 | -1.850264 | 0.012519  |
| 46.Au | -1.302963 | 1.472008  | -0.041800 |
| 47.Au | 1.922349  | 0.388958  | -0.042106 |
| 48.C  | 3.487296  | -2.239951 | 0.022584  |

Table S5: Atomic coordinates for the optimized ground state geometry of AuPzT (dimer)

| <b>Atom</b> | <b>X (Å)</b> | <b>Y (Å)</b> | <b>Z (Å)</b> |
|-------------|--------------|--------------|--------------|
| 1.C         | 0.044981     | 1.929527     | -3.936416    |
| 2.H         | -0.701329    | 1.780357     | -4.705935    |
| 3.C         | 1.421017     | 2.188637     | -4.052699    |
| 4.C         | 1.866516     | 2.251663     | -2.722734    |
| 5.H         | 2.855979     | 2.447404     | -2.329321    |
| 6.C         | 2.186064     | 2.356200     | -5.275781    |
| 7.C         | 1.742721     | 2.731708     | -6.528718    |
| 8.H         | 0.705148     | 2.983838     | -6.731819    |
| 9.C         | 2.772435     | 2.784727     | -7.504198    |
| 10.H        | 2.610731     | 3.068886     | -8.540992    |
| 11.C        | 4.004061     | 2.452269     | -6.998633    |
| 12.H        | 4.960954     | 2.420840     | -7.507013    |
| 13.C        | 1.514026     | 2.303750     | 3.068874     |
| 14.H        | 2.533970     | 2.524636     | 2.782866     |
| 15.C        | 0.924613     | 2.232384     | 4.342588     |
| 16.C        | -0.416307    | 1.911623     | 4.073035     |
| 17.H        | -1.243116    | 1.751535     | 4.753827     |
| 18.C        | 1.568084     | 2.437298     | 5.627677     |
| 19.C        | 2.885941     | 2.756231     | 5.898157     |
| 20.H        | 3.629270     | 2.903007     | 5.118910     |
| 21.C        | 3.169049     | 2.877683     | 7.283620     |
| 22.H        | 4.149633     | 3.124776     | 7.682586     |
| 23.C        | 2.069449     | 2.652112     | 8.072913     |
| 24.H        | 1.992407     | 2.679059     | 9.153794     |
| 25.S        | 0.678191     | 2.289084     | 7.119568     |
| 26.C        | -5.092521    | 0.540800     | 0.880024     |



Table S5 (Continued)

|       |            |           |           |
|-------|------------|-----------|-----------|
| 27.H  | -5.360893  | 0.437861  | 1.923571  |
| 28.C  | -5.860993  | 0.321476  | -0.275943 |
| 29.C  | -4.973355  | 0.603411  | -1.326768 |
| 30.H  | -5.135755  | 0.583012  | -2.397261 |
| 31.C  | -7.250235  | -0.094973 | -0.351185 |
| 32.C  | -8.225788  | -0.040566 | 0.625378  |
| 33.H  | -8.044222  | 0.370150  | 1.615233  |
| 34.C  | -9.485426  | -0.536026 | 0.198711  |
| 35.H  | -10.370972 | -0.563767 | 0.828568  |
| 36.C  | -9.473396  | -0.972031 | -1.102432 |
| 37.H  | -10.285780 | -1.389524 | -1.686152 |
| 38.S  | -7.911099  | -0.784021 | -1.810470 |
| 39.N  | -0.294061  | 1.850871  | -2.636395 |
| 40.N  | 0.830845   | 2.048263  | -1.887000 |
| 41.N  | 0.591127   | 2.044944  | 2.124104  |
| 42.N  | -0.601825  | 1.802566  | 2.744021  |
| 43.N  | -3.847738  | 0.921965  | 0.534656  |
| 44.N  | -3.773396  | 0.959299  | -0.829275 |
| 45.S  | 3.904730   | 2.061423  | -5.319894 |
| 46.Au | 0.725643   | 2.015703  | 0.119654  |
| 47.Au | -2.229875  | 1.358470  | 1.649761  |
| 48.Au | -2.039527  | 1.414941  | -1.740599 |
| 49.Au | 2.039528   | -1.414901 | -1.740429 |
| 50.C  | -1.513953  | -2.303805 | 3.069161  |
| 51.H  | -2.533814  | -2.525034 | 2.783150  |
| 52.C  | -0.924510  | -2.232533 | 4.342859  |
| 53.C  | 0.416332   | -1.911415 | 4.073301  |
| 54.H  | 1.243166   | -1.751393 | 4.754079  |
| 55.C  | -1.567848  | -2.438136 | 5.627911  |
| 56.C  | -2.885587  | -2.757623 | 5.898325  |
| 57.H  | -3.628923  | -2.904238 | 5.119054  |
| 58.C  | -3.168538  | -2.879991 | 7.283743  |
| 59.H  | -4.149002  | -3.127667 | 7.682652  |
| 60.C  | -2.068927  | -2.654585 | 8.073070  |
| 61.H  | -1.991761  | -2.682239 | 9.153924  |
| 62.C  | 5.092208   | -0.539680 | 0.880215  |
| 63.H  | 5.360438   | -0.436299 | 1.923756  |

Table S5 (Continued)

---

|       |           |           |           |
|-------|-----------|-----------|-----------|
| 64.C  | 5.860884  | -0.320982 | -0.275743 |
| 65.C  | 4.973229  | -0.602840 | -1.326569 |
| 66.H  | 5.135641  | -0.582441 | -2.397061 |
| 67.C  | 7.250139  | 0.095430  | -0.350964 |
| 68.C  | 8.225583  | 0.041315  | 0.625729  |
| 69.H  | 8.043910  | -0.369133 | 1.615673  |
| 70.C  | 9.485276  | 0.536620  | 0.199050  |
| 71.H  | 10.370757 | 0.564497  | 0.828987  |
| 72.C  | 9.473366  | 0.972353  | -1.102184 |
| 73.H  | 10.285812 | 1.389693  | -1.685928 |
| 74.S  | 7.911183  | 0.784009  | -1.810384 |
| 75.C  | -0.045050 | -1.929687 | -3.936142 |
| 76.H  | 0.701255  | -1.780680 | -4.705698 |
| 77.C  | -1.421084 | -2.188843 | -4.052354 |
| 78.C  | -1.866552 | -2.251722 | -2.722381 |
| 79.H  | -2.855999 | -2.447446 | -2.328917 |
| 80.C  | -2.186120 | -2.356710 | -5.275392 |
| 81.C  | -1.742711 | -2.732567 | -6.528184 |
| 82.H  | -0.705151 | -2.984847 | -6.731103 |
| 83.C  | -2.772339 | -2.785740 | -7.503741 |
| 84.H  | -2.610564 | -3.070138 | -8.540458 |
| 85.C  | -4.003991 | -2.453122 | -6.998341 |
| 86.H  | -4.960844 | -2.421778 | -7.506801 |
| 87.S  | -3.904790 | -2.061982 | -5.319661 |
| 88.N  | -0.591139 | -2.044706 | 2.124395  |
| 89.N  | 0.601789  | -1.802157 | 2.744289  |
| 90.N  | 3.847597  | -0.921424 | 0.534841  |
| 91.N  | 3.773357  | -0.959054 | -0.829089 |
| 92.N  | 0.294034  | -1.850909 | -2.636142 |
| 93.N  | -0.830849 | -2.048281 | -1.886704 |
| 94.S  | -0.677870 | -2.290539 | 7.119816  |
| 95.Au | 2.229796  | -1.358014 | 1.649976  |
| 96.Au | -0.725652 | -2.015545 | 0.119943  |

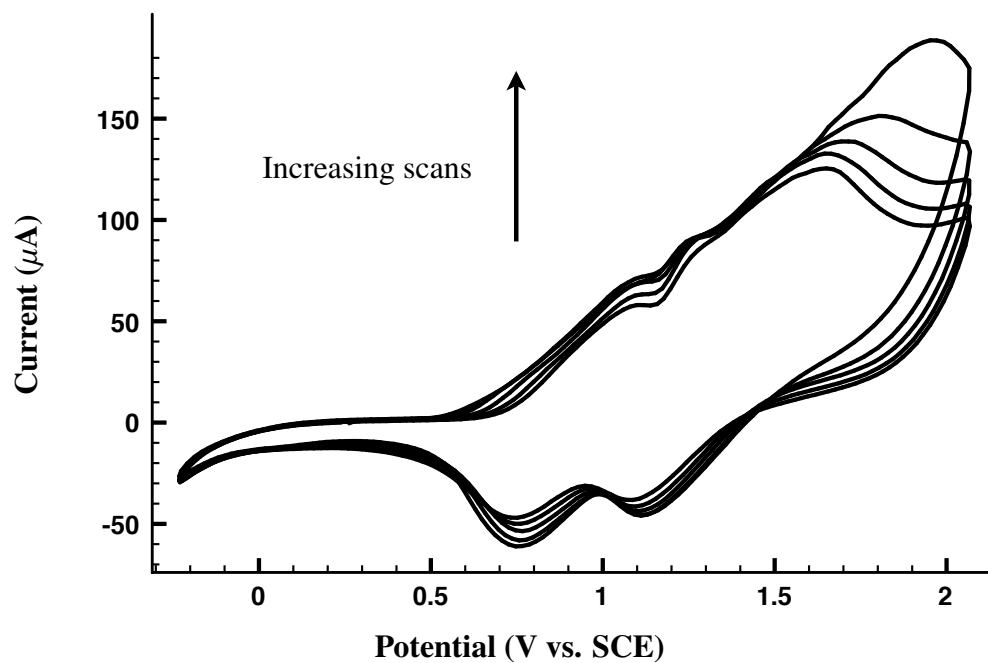

Figure S3: Successive cyclic voltammograms of AuPz3HT on ITO. Data were collected at a scan rate of  $100 \text{ mV s}^{-1}$  in  $\text{CH}_2\text{Cl}_2$  with  $0.1 \text{ M } [n\text{-Bu}_4\text{N}][\text{PF}_6]$  as the supporting electrolyte.

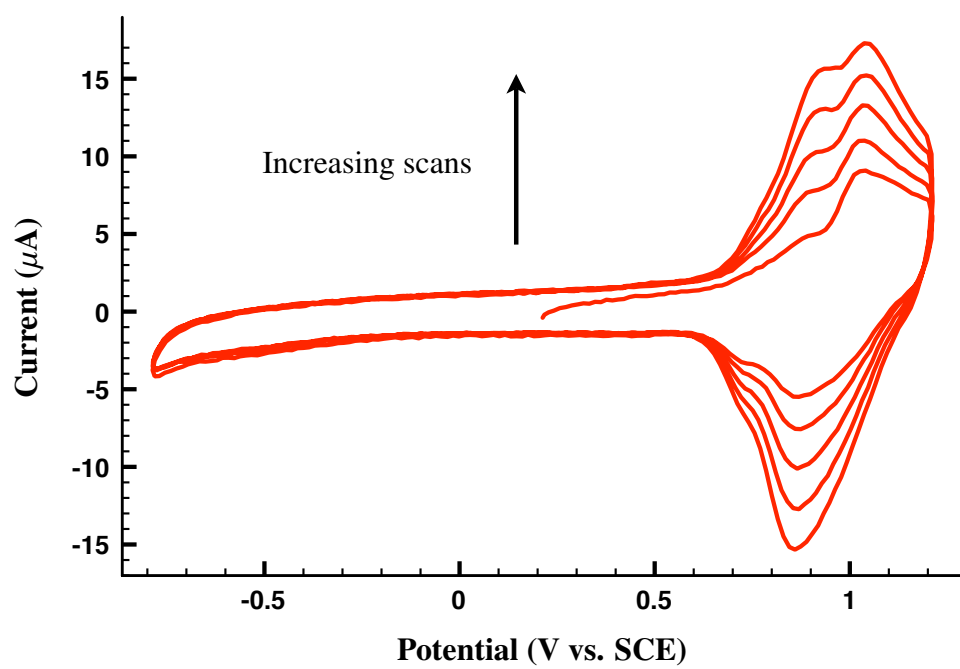

Figure S4: Cyclic voltammogram of AuPz\*3HT<sub>2</sub> on ITO. Data were collected at a scan rate of 100 mV s<sup>-1</sup> in CH<sub>2</sub>Cl<sub>2</sub> with 0.1 M [*n*-Bu<sub>4</sub>N][PF<sub>6</sub>] as the supporting electrolyte.
